# Supplementary material for: Comparison of neutrophil to lymphocyte ratio and prognostic nutritional index with other clinical and molecular biomarkers for prediction of glioblastoma multiforme outcome
Source: PubMed Central journal article supplement (PMC8211244; doi:10.1371/journal.pone.0252614), 2021-06-17
Supplement: pone.0252614.s001.pdf [file pone.0252614.s001.pdf]

**S1 Table.** Univariate and multivariate analyses for PFS and OS

| Variables                           | Univariate analysis |       |                |                |                  |                  | Multivariate analysis |       |                |               |              |              |
|-------------------------------------|---------------------|-------|----------------|----------------|------------------|------------------|-----------------------|-------|----------------|---------------|--------------|--------------|
|                                     | HR                  |       | 95% CI         |                | P value*         |                  | HR                    |       | 95% CI         |               | P value      |              |
|                                     | PFS                 | OS    | PFS            | OS             | PFS              | OS               | PFS                   | OS†   | PFS            | OS†           | PFS          | OS†          |
| Type                                | 0.268               | 0.267 | 0.037 – 1.967  | 0.035 – 2.038  | 0.196            | 0.203            | -                     | -     | -              | -             | -            | -            |
| Gender                              | 0.532               | 0.670 | 0.315 – 0.900  | 0.408 – 1.098  | <b>0.019</b>     | 0.112            | 0.722                 | -     | 0.324 – 1.611  | -             | 0.427        | -            |
| BMI                                 | 0.968               | 0.960 | 0.931 – 1.006  | 0.925 – 0.996  | 0.098            | <b>0.028</b>     | -                     | -     | -              | -             | -            | 0.269        |
| IDH mutation                        | 0.186               | 0.037 | 0.045 – 0.770  | 0.001 – 1.008  | <b>0.020</b>     | 0.051            | 0.195                 | -     | 0.039 – 0.970  | -             | <b>0.046</b> | -            |
| MGMT methylation                    | 0.656               | 0.553 | 0.322 – 1.338  | 0.258 – 1.183  | 0.247            | 0.127            | -                     | -     | -              | -             | -            | -            |
| EGFR mutation                       |                     |       |                |                |                  |                  |                       |       |                |               |              |              |
| EGFR mutation vs without            | 1.444               | 2.205 | 0.531 – 3.927  | 0.778 – 6.255  | 0.471            | 0.137            | -                     | -     | -              | -             | -            | -            |
| EGFRvIII vs without                 | 1.050               | 0.187 | 0.207 – 5.330  | 0.022 – 1.583  | 0.953            | 0.124            | -                     | -     | -              | -             | -            | -            |
| Ki67                                | 0.995               | 0.994 | 0.983 – 1.008  | 0.981 – 1.008  | 0.474            | 0.406            | -                     | -     | -              | -             | -            | -            |
| GFAP mutation                       | 0.737               | 0.817 | 0.099 – 5.462  | 0.111 – 6.017  | 0.765            | 0.843            | -                     | -     | -              | -             | -            | -            |
| Temozolomide                        | 1.182               | 0.425 | 0.767 – 1.823  | 0.177 – 1.024  | 0.449            | 0.056            | -                     | -     | -              | -             | -            | -            |
| Temozolomide average dose           | 0.996               | 0.995 | 0.992 – 0.999  | 0.991 – 0.999  | <b>0.020</b>     | <b>0.018</b>     | 0.999                 | -     | 0.994 – 1.004  | -             | 0.690        | 0.586        |
| Radiotherapy                        | 0.094               | 0.101 | 0.038 – 0.228  | 0.050 – 0.203  | <b>&lt;0.001</b> | <b>&lt;0.001</b> | 0.523                 | -     | 0.062 – 4.425  | -             | 0.552        | 0.456        |
| Radiotherapy total dose             | 0.995               | 0.972 | 0.971 – 1.020  | 0.948 – 0.997  | 0.717            | <b>0.029</b>     | -                     | -     | -              | -             | -            | -            |
| Received another chemotherapy       | 0.820               | 0.742 | 0.501 – 1.343  | 0.454 – 1.211  | 0.431            | 0.233            | -                     | -     | -              | -             | -            | -            |
| Dexamethasone                       | 2.643               | 2.536 | 1.419 – 4.922  | 1.336 – 4.816  | <b>0.002</b>     | <b>0.004</b>     | 3.599                 | -     | 1.197 – 10.819 | -             | <b>0.023</b> | 0.231        |
| Anti-convulsants                    | 1.153               | 1.278 | 0.691 – 1.926  | 0.769 – 2.123  | 0.585            | 0.344            | -                     | -     | -              | -             | -            | -            |
| Neurological conditions             | 0.687               | 1.015 | 0.275 – 1.716  | 0.461 – 2.234  | 0.422            | 0.970            | -                     | -     | -              | -             | -            | -            |
| Dyslipidaemia/hypercholesterolaemia | 0.966               | 0.906 | 0.567 – 1.648  | 0.524 – 1.564  | 0.900            | 0.722            | -                     | -     | -              | -             | -            | -            |
| Type II diabetes                    | 0.888               | 0.761 | 0.474 – 1.664  | 0.405 – 1.430  | 0.711            | 0.396            | -                     | -     | -              | -             | -            | -            |
| Hypertension                        | 0.955               | 0.812 | 0.577 – 1.580  | 0.489 – 1.348  | 0.857            | 0.420            | -                     | -     | -              | -             | -            | -            |
| Depression                          | 2.388               | 1.923 | 0.994 – 5.737  | 0.820 – 4.508  | 0.052            | 0.133            | -                     | -     | -              | -             | -            | -            |
| Other cancer                        | 2.100               | 2.217 | 0.948 – 4.652  | 0.988 – 4.977  | 0.067            | 0.054            | -                     | -     | -              | -             | -            | -            |
| Previous surgery                    | 1.838               | 2.065 | 1.045 – 3.231  | 1.192 – 3.575  | <b>0.035</b>     | <b>0.010</b>     | 1.948                 | 2.825 | 0.874 – 4.345  | 1.234 – 6.466 | 0.103        | <b>0.014</b> |
| Age at diagnosis                    | 1.019               | 1.026 | 1.002 – 1.036  | 1.008 – 1.045  | <b>0.029</b>     | <b>0.006</b>     | 0.987                 | -     | 0.959 – 1.016  | -             | 0.378        | 0.530        |
| EOR                                 |                     |       |                |                |                  |                  |                       |       |                |               |              |              |
| STR vs biopsy                       | 0.252               | 0.288 | 0.112 – 0.567  | 0.146 – 0.567  | <b>0.001</b>     | <b>&lt;0.001</b> | 0.408                 | 0.205 | 0.102 – 1.628  | 0.061 – 0.697 | 0.204        | <b>0.011</b> |
| GTR vs biopsy                       | 0.111               | 0.130 | 0.046 – 0.267  | 0.061 – 0.280  | <b>&lt;0.001</b> | <b>&lt;0.001</b> | 0.325                 | 0.145 | 0.071 – 1.490  | 0.039 – 0.539 | 0.148        | <b>0.004</b> |
| Preoperative                        |                     |       |                |                |                  |                  |                       |       |                |               |              |              |
| ECOG                                |                     |       |                |                |                  |                  |                       |       |                |               |              |              |
| 1 vs 0                              | 1.039               | 0.810 | 0.616 – 1.753  | 0.484 – 1.357  | 0.886            | 0.423            | -                     | -     | -              | -             | -            | -            |
| 2 vs 0                              | 1.488               | 1.406 | 0.510 – 4.342  | 0.534 – 3.701  | 0.467            | 0.490            | -                     | -     | -              | -             | -            | -            |
| 3 vs 0                              | 1.341               | 1.399 | 0.179 – 10.060 | 0.187 – 10.441 | 0.775            | 0.744            | -                     | -     | -              | -             | -            | -            |
| Dexamethasone                       | 1.449               | 1.282 | 0.852 – 2.465  | 0.756 – 2.175  | 0.171            | 0.357            | -                     | -     | -              | -             | -            | -            |
| NLR                                 | 1.057               | 1.002 | 0.631 – 1.773  | 0.604 – 1.662  | 0.833            | 0.994            | -                     | -     | -              | -             | -            | -            |
| PNI                                 | 0.922               | 0.566 | 0.522 – 1.629  | 0.332 – 0.964  | 0.780            | <b>0.036</b>     | -                     | -     | -              | -             | -            | 0.369        |
| Postoperative                       |                     |       |                |                |                  |                  |                       |       |                |               |              |              |
| ECOG                                |                     |       |                |                |                  |                  |                       |       |                |               |              |              |
| 1 vs 0                              | 1.260               | 1.787 | 0.710 – 2.235  | 0.961 – 3.322  | 0.430            | 0.066            | 0.417                 | -     | 0.179 – 0.973  | -             | <b>0.043</b> | 0.115        |
| 2 vs 0                              | 1.739               | 3.057 | 0.845 – 3.578  | 1.522 – 6.141  | 0.133            | <b>0.002</b>     | 0.645                 | -     | 0.211 – 1.975  | -             | 0.443        | 0.797        |
| 3 vs 0                              | 3.795               | 5.471 | 1.597 – 9.023  | 2.278 – 13.135 | <b>0.003</b>     | <b>&lt;0.001</b> | 0.900                 | -     | 0.198 – 4.090  | -             | 0.892        | 0.056        |
| 4 vs 0                              | 0.000               | 9.587 | 0.000 – 0.000  | 2.079 – 44.208 | 0.982            | <b>0.004</b>     | -                     | -     | -              | -             | -            | 0.057        |
| Dexamethasone                       | 1.806               | 2.581 | 1.092 – 2.985  | 1.525 – 4.370  | <b>0.021</b>     | <b>&lt;0.001</b> | 0.968                 | -     | 0.477 – 1.965  | -             | 0.928        | 0.140        |
| NLR                                 | 1.395               | 1.832 | 0.783 – 2.484  | 1.054 – 3.185  | 0.258            | <b>0.032</b>     | -                     | -     | -              | -             | -            | 0.179        |
| PNI                                 | 0.501               | 0.436 | 0.296 – 0.846  | 0.259 – 0.735  | <b>0.010</b>     | <b>0.002</b>     | 0.804                 | -     | 0.390 – 1.659  | -             | 0.555        | 0.151        |

BMI = body mass index, IDH = isocitrate dehydrogenase, MGMT = O<sup>6</sup>methylguanine DNA methyltransferase, EGFR = epidermal growth factor receptor, GFAP = glial fibrillary acidic protein, EOR = extent of resection, STR = subtotal resection, GTR = gross total resection, ECOG = Eastern Cooperative Oncology Group, NLR = neutrophil to lymphocyte ratio, PNI = prognostic nutritional index

\*P values in bold are significant, †Results from multivariate analysis with forward selection process
